# Supplementary material for: Passivation of native defects of ZnO by doping Mg detected through various spectroscopic techniques
Source: Royal Society of Chemistry journal article supplement (doi:10.1039/c5ra04767f), 2015-01-01
Supplement: c5ra04767f1.pdf [file c5ra04767f1.pdf]

## Supplementary data

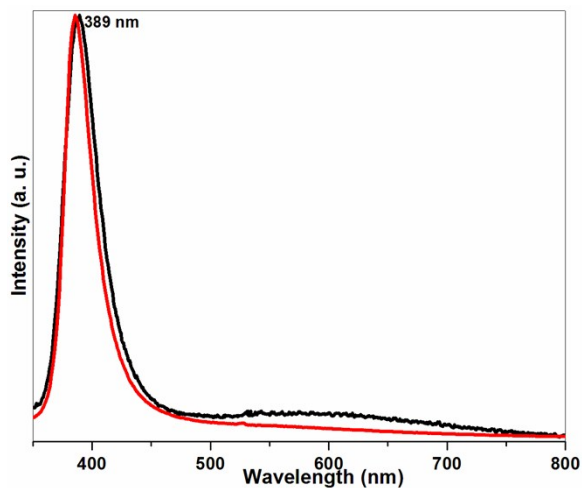

**Fig. 1:** Normalised photoluminescence spectra of ZnO and Zn<sub>0.96</sub>Mg<sub>0.04</sub>O nanoparticles.

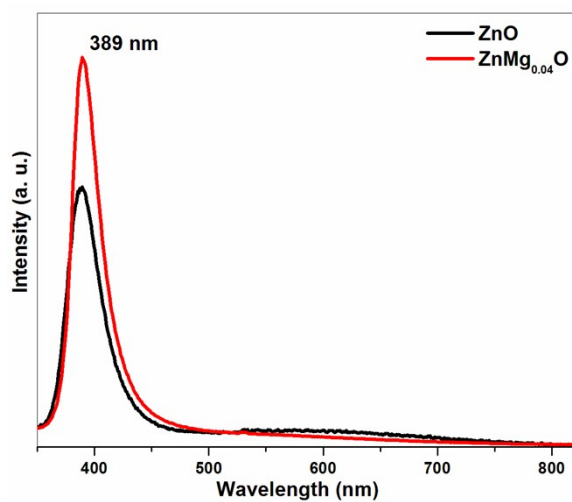

**Fig. 2:** Photoluminescence spectra of ZnO and Zn<sub>0.96</sub>Mg<sub>0.04</sub>O nanoparticles without normalising.

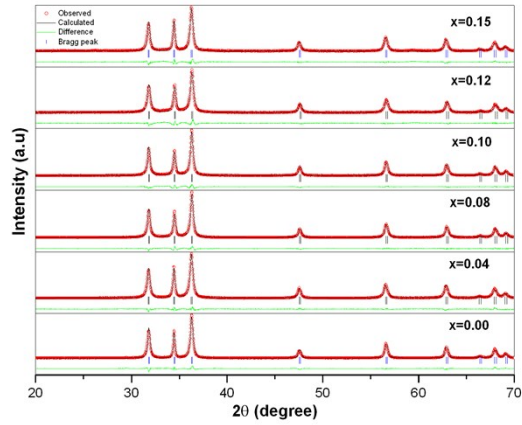

**Fig. 3:** Le Bail refinements of X-ray diffraction pattern for  $Zn_{1-x}Mg_xO$  ( $x = 0, 0.04, 0.08, 0.12, 0.10$  and  $0.15$ ) nanoparticles.

**Table:** Refined parameters from Le Bail refinements of X-ray diffraction pattern for  $Zn_{1-x}Mg_xO$  ( $x = 0, 0.04, 0.08, 0.12, 0.10$  and  $0.15$ ) nanoparticles.

| Sample name<br>(P 63 m c) | Cell Parameters |        |         |        |          |
|---------------------------|-----------------|--------|---------|--------|----------|
|                           | a=b             | c      | Volume  | c/a    | $\chi^2$ |
| 089-1397                  | 3.253           | 5.213  | 47.77   | 1.6025 | -----    |
| ZnO                       | 3.2491          | 5.2056 | 47.5908 | 1.6022 | 2.17     |
| $Zn_{0.96}Mg_{0.04}O$     | 3.2514          | 5.2076 | 47.6761 | 1.6017 | 3.11     |
| $Zn_{0.92}Mg_{0.08}O$     | 3.2483          | 5.2006 | 47.5236 | 1.6010 | 3.12     |
| $Zn_{0.90}Mg_{0.10}O$     | 3.2487          | 5.2010 | 47.5382 | 1.6009 | 3.59     |
| $Zn_{0.88}Mg_{0.12}O$     | 3.2478          | 5.1981 | 47.4839 | 1.6005 | 3.69     |
| $Zn_{0.85}Mg_{0.15}O$     | 3.2511          | 5.2076 | 47.6685 | 1.6018 | 3.43     |

*a, b, and c are in Å,  $\alpha = \beta = 90^\circ$  and  $\gamma = 120^\circ$ , (D is in nm)*

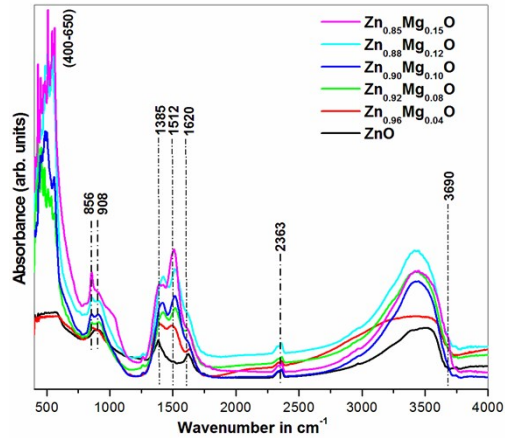

**Fig. 4:** FT-IR absorbance spectrum of Zn<sub>1-x</sub>Mg<sub>x</sub>O ( $x = 0, 0.04, 0.08, 0.12, 0.10$  and  $0.15$ ) nanoparticles.
